# Supplementary material
Source: publisher figshare collection journal article supplement (https://gsapubs.figshare.com/ndownloader/files/22742204)

## Appendices

### I. Thermodynamic solubilities of Fe oxides, Al hydroxides, rutile, and silica at 25°C

This diagram was constructed to show that the mobility of Ti is lower than Al in all pH conditions, and that the theoretical solubility of magnetite under a reduced condition is very high.

The data source are:

SiO<sub>2</sub>(am) and Fe(OH)<sub>3</sub>: Stumm and Morgan (1981)

Al(OH)<sub>3</sub>: Wesolowski and Palmer (1994)

TiO<sub>2</sub> and Ti(OH)<sub>4</sub>: Baes and Mesmer (1976) and Ziemniak et al. (1993).

Fe<sub>3</sub>O<sub>4</sub>: the solubility values are calculated for a condition of  $P_{H_2} = 10^{-3}$  atm from the experimental data of Tremaine and LeBlanc (1980) at  $T = 100^\circ\text{C}$  and  $P_{H_2} = 1$  atm.

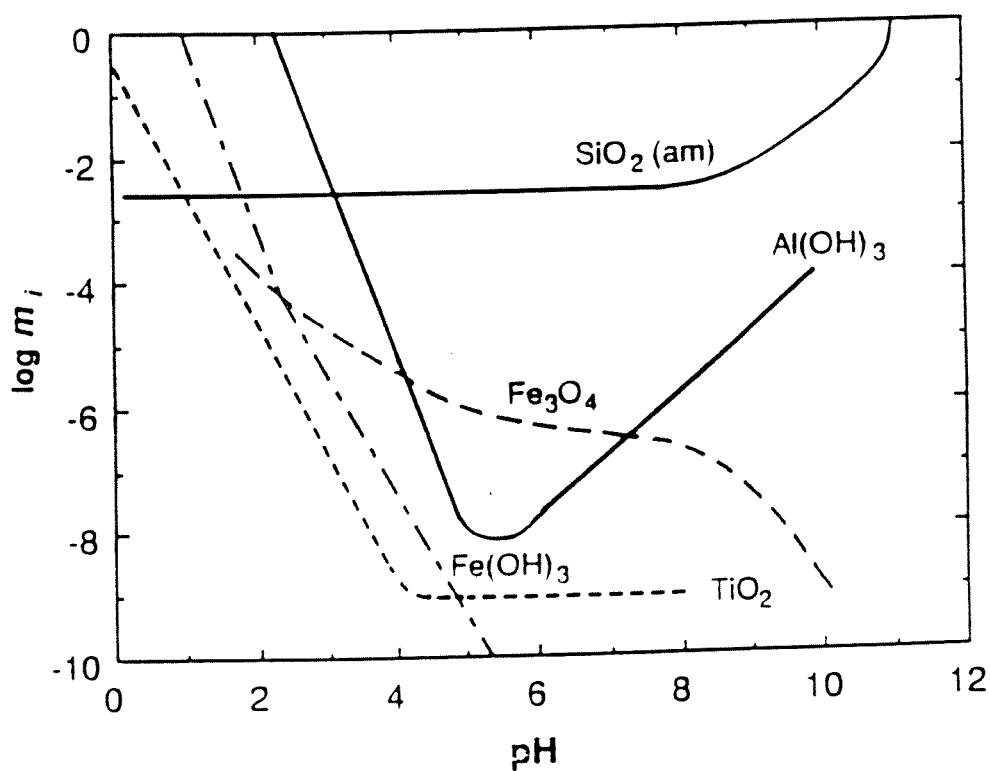

## II. Kinetics of dissolution of magnetite

The following paragraph, presenting a detailed discussion on the sluggishness of magnetite dissolution reaction at low temperatures, is removed from the text because space limitation.

Theoretically, the solubility of magnetite in organic-free solution is controlled by the following reaction:

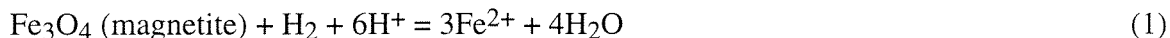

Solubility experiments on magnetite through reaction (1) have been carried out by several groups of investigators (Sweeton and Baes, 1970; Tremaine and LeBlanc, 1980) at temperatures up to 300 °C. The experiments were typically carried out using synthetic magnetite powders, rather than using natural crystals. Steady-state concentrations of  $\text{Fe}^{2+}$  in the experimental solutions were achieved in less than ~10 min even at temperatures as low as 50 °C. Such data give an impression that equilibrium is readily established in reaction 1 and that magnetite is easily dissolved in  $\text{H}_2$ -rich, low-temperature solutions. However, a close examination of the experimental data has revealed that the  $\text{Fe}^{2+}$  contents and the  $\text{Fe}^{3+}/\text{Fe}^{2+}$  ratios in solutions did not respond to the variations in the  $P_{\text{H}_2}$  as expected from reaction 1, and the measured solubility values were several orders of magnitude less than the theoretical solubility values at all temperatures. Such findings suggest that the  $\text{Fe}^{2+}$  measured in the experimental solutions came from dissolution of "unstable" FeO on the surfaces and edges of synthetic magnetite, rather than from dissolution of both FeO and  $\text{Fe}_2\text{O}_3$  in the magnetite crystal lattice.

Reductive dissolution of  $\text{Fe}_3\text{O}_4$  and the attainment of the theoretical solubility values for magnetite in organic-free solutions appear to be very difficult at near-surface temperatures. For example, it took ~2000 h for Kishima and Sakai (1984) to reduce hematite ( $\text{Fe}_2\text{O}_3$ ) to magnetite by  $\text{H}_2$ -rich aqueous solutions and to attain equilibrium among  $\text{H}_2$ ,  $\text{Fe}^{2+}$  and  $\text{Fe}^{3+}$  species in aqueous solutions at 300 °C. This reaction rate is about two orders of magnitude slower than that to reduce aqueous sulfate ( $\text{S}^{6+}$  species) to  $\text{H}_2\text{S}$  ( $\text{S}^{2-}$  species) by  $\text{H}_2$  and to attain equilibrium among  $\text{H}_2$ ,  $\text{S}^{2-}$ , and  $\text{S}^{6+}$ -species at the same temperature (Ohmoto and Lasaga, 1982). At 25 °C, it takes more than

$10^9$  yr to achieve equilibrium among  $H_2$ ,  $S^{2-}$ , and  $S^{6+}$  species. Although there is a lack of experimental data, it is probable that more than 1 b.y. are also required to attain equilibrium among  $H_2$ ,  $Fe^{2+}$ , and  $Fe^{3+}$ -species even when the  $P_{H_2}$  is as high as  $10^{-3}$  atm and pH is as low as 4.5. In other words, significant dissolution of magnetite (and other  $Fe^{3+}$ -minerals) is unlikely to occur by an inorganic mechanism during the formation of a soil profile which typically completes in less than 10 m.y.

The above suggestion is supported by White et al. (1994) who have shown experimentally that the long-term dissolution rates of magnetite under an anoxic condition is much slower than those proposed by previous investigators, and that sand-size grains of magnetite will persist more than 10 m.y. during weathering.

### **III. Depth profiles of $\text{Fe}^{3+}/\text{Ti}$ , $\text{Fe}^{2+}/\text{Ti}$ , and $\Sigma\text{Fe}/\text{Ti}$ ratios, and $\text{Fe}^{3+}/\text{Ti}$ vs $\text{Fe}^{2+}/\text{Ti}$ plots of paleosols examined in this study**

They are arranged in order of decreasing age: Pre-Pongola (3.0-2.8 Ga), Dominion (2.9-2.8 Ga), Villebon (2.75 Ga), Mt. Roe (2.75 Ga), Hokkalampi (2.5-2.2 Ga), Ville Marie (2.45-2.2 Ga), Denison (2.45-2.25 Ga), Pronto (2.4-2.3 Ga), Quirke II - DDH270 (2.4 Ga), Hekpoort (2.2 Ga), Drakenstein (2.2-2.0 Ga), Flin Flon-1 (1.8 Ga), Flin Flon-2 (1.8 Ga), Athabaska-20 (1.5 Ga), Athabaska-81 (1.5 Ga), Drake (350 Ma), and Barynton (modern).

**References for Appendices (excluding those included in the text)**

- Baes, C. F., Jr., and Mesmer, R. E., 1976, The hydrolysis of cations: New York, Wiley, 489p.
- Macdonald, C. C., 1980, Mineralogy and geochemistry of a Precambrian regolith in the Athabaska Basin: Master's thesis, Saskatoon, Canada, University of Saskatchewan (quoted in Holland, 1984).
- Macfarlane, A. W., Danielson, A., and Holland, H. D., 1994, Geology and major and trace element chemistry of late Archean weathering profiles in the Fortescue Group, Western Australia: Implications for atmospheric  $P_{O_2}$ : *Precambrian Research*, v. 65, p. 297-317.
- Nesbitt, H. W., and Wilson, R. E., 1992, Recent chemical weathering of basalts: *American Journal of Science*, v. 292, p. 740-771.
- Ohmoto, H., and Lasaga, A. C., 1982, Kinetics of reactions between aqueous sulfates and sulfides in hydrothermal systems: *Geochimica et Cosmochimica Acta*, v. 46, p. 1727-1745.
- Sweeton, F. H., and Baes, C. F., Jr., 1970, The solubility of magnetite and hydrolysis of ferrous ion in aqueous solutions at elevated temperatures: *Journal of Chemical Thermodynamics*, v. 2, p. 479-500.
- Wesolowski, D. J., and Palmer, D. A., 1994, Aluminum speciation and equilibria in aqueous solution: V. Gibbsite solubility at 50°C and pH 3-9 in 0.9 molal NaCl solutions (a general model for aluminum speciation; analytical methods: *Geochimica et Cosmochimica Acta*, v. 58, p. 2947-2970.
- Ziemniak, S. E., Jones, M. E., and Combs, K. E. S., 1993, Solubility behavior of titanium (IV) oxide in alkaline media at elevated temperatures: *Journal of Solution Chemistry*, v. 22, p. 601-623.

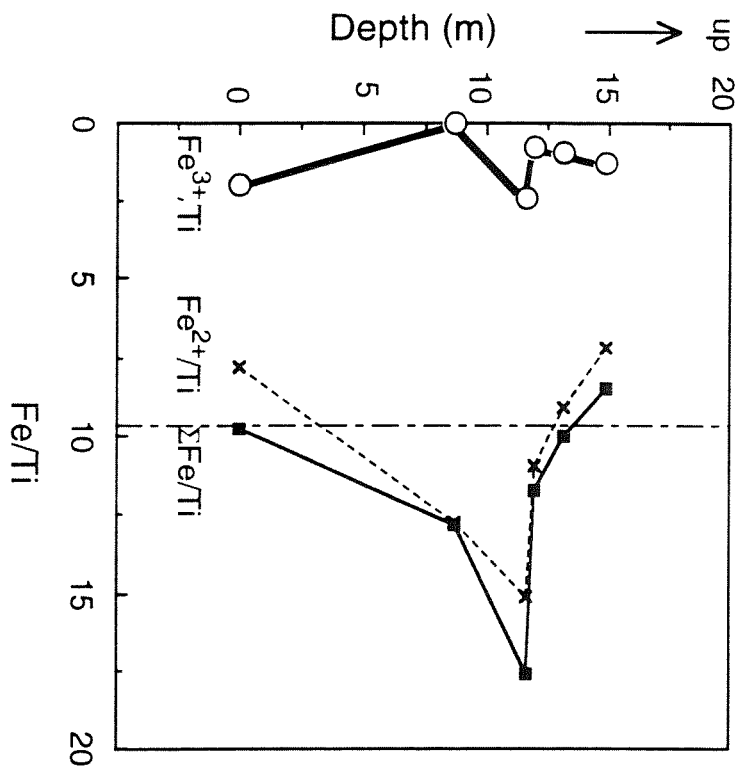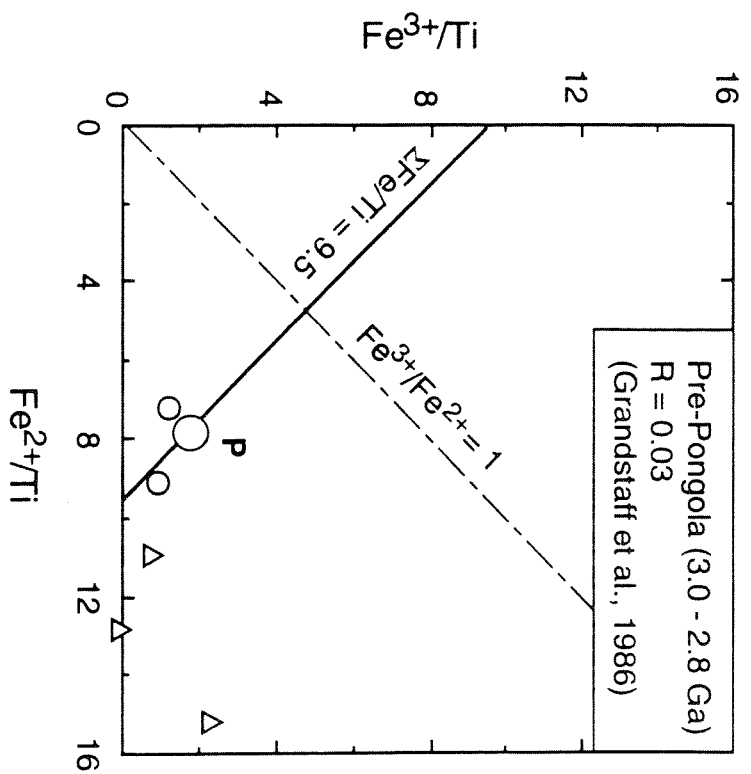

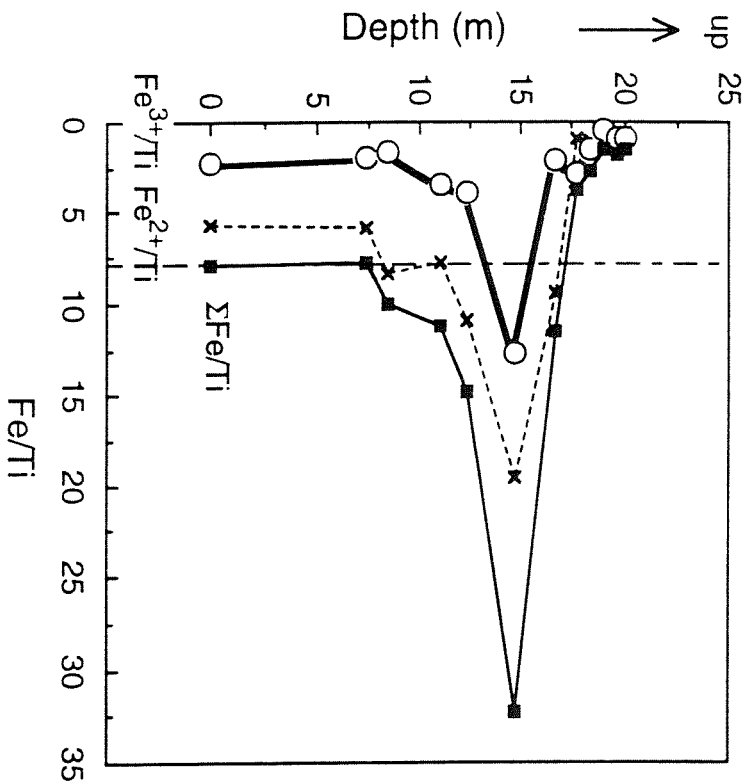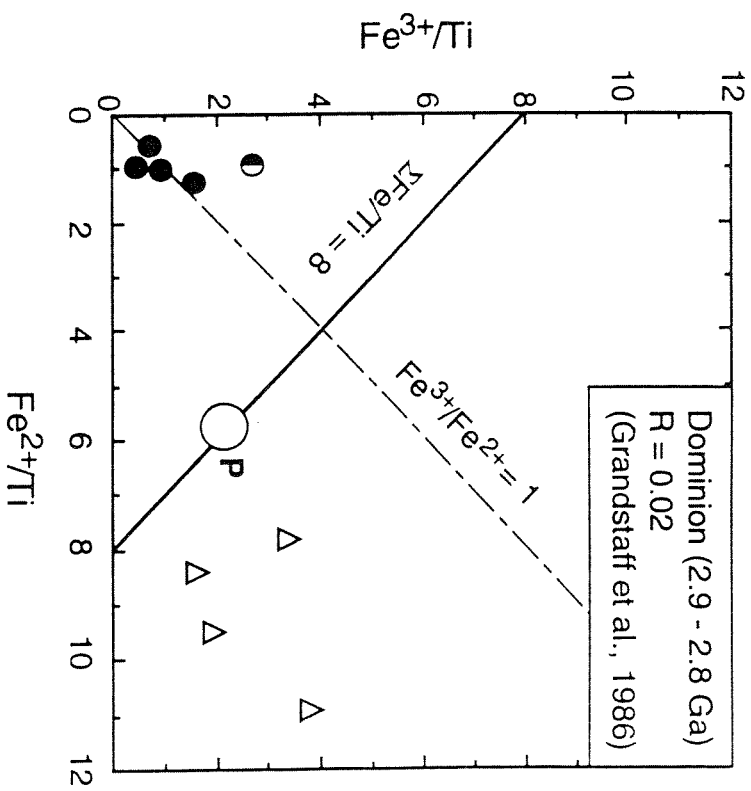

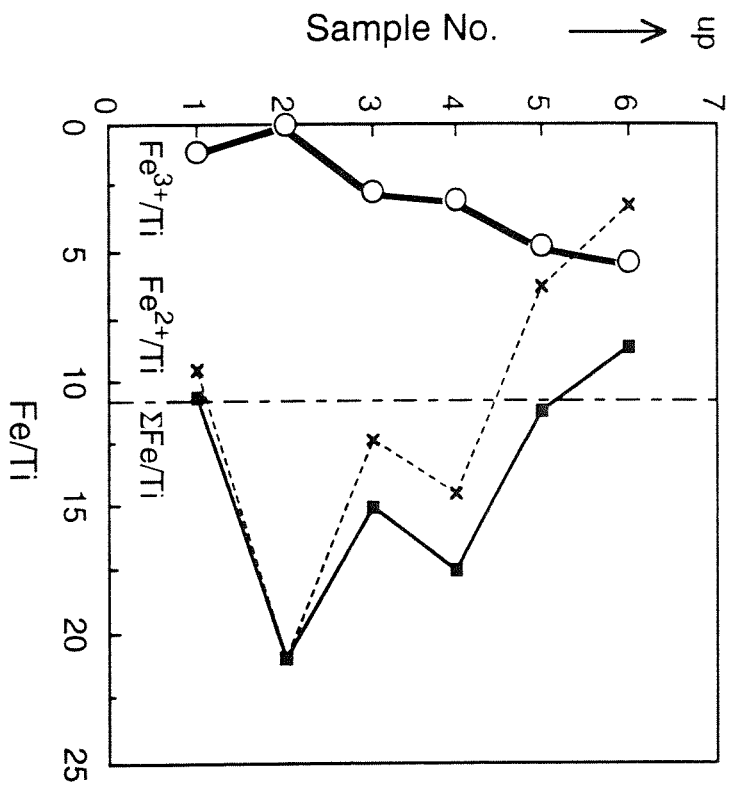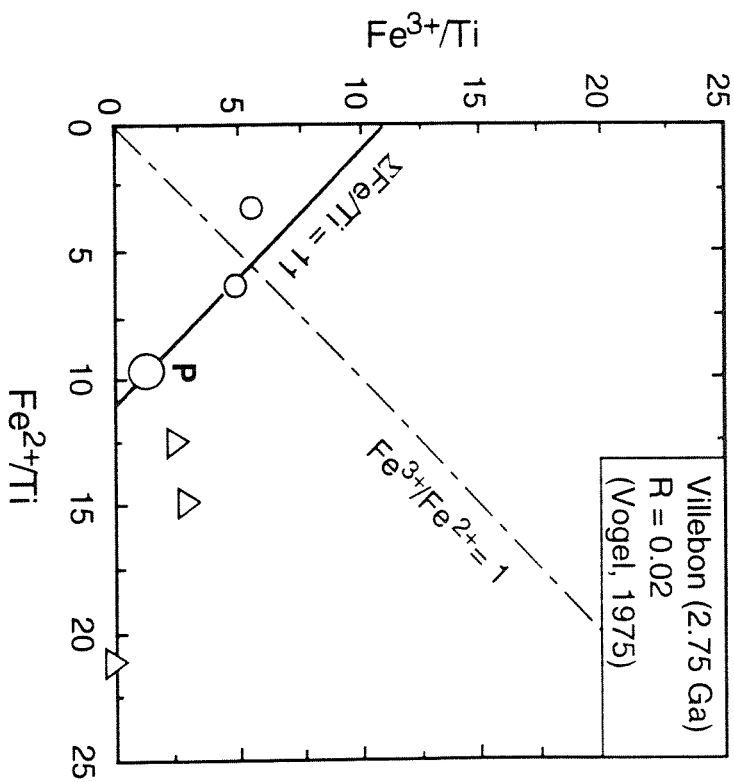



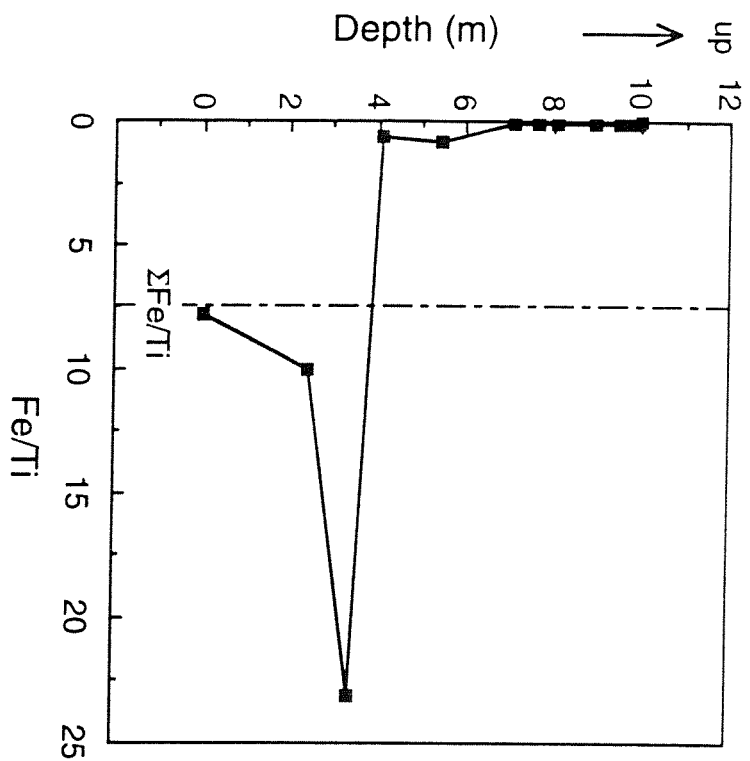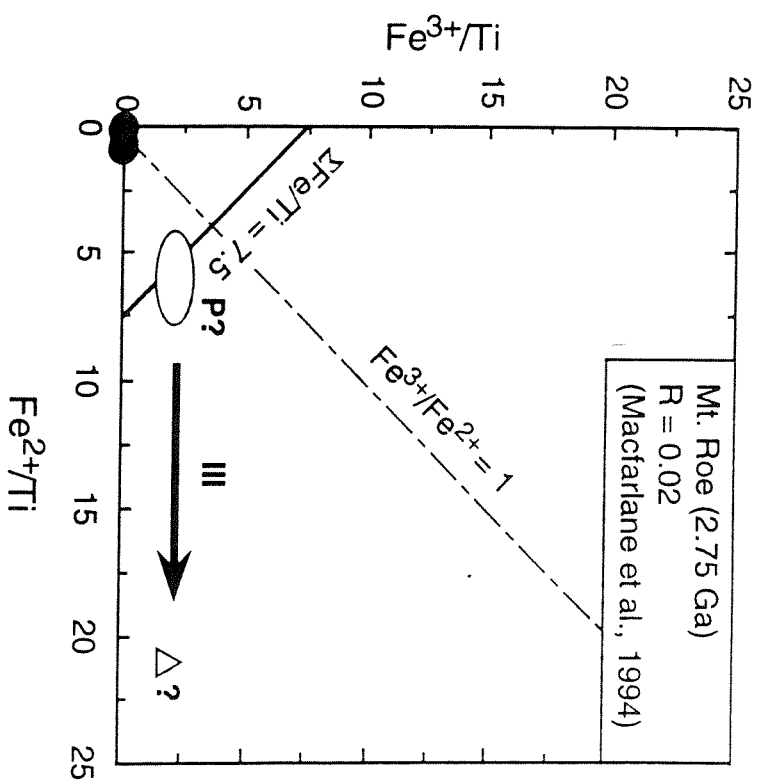

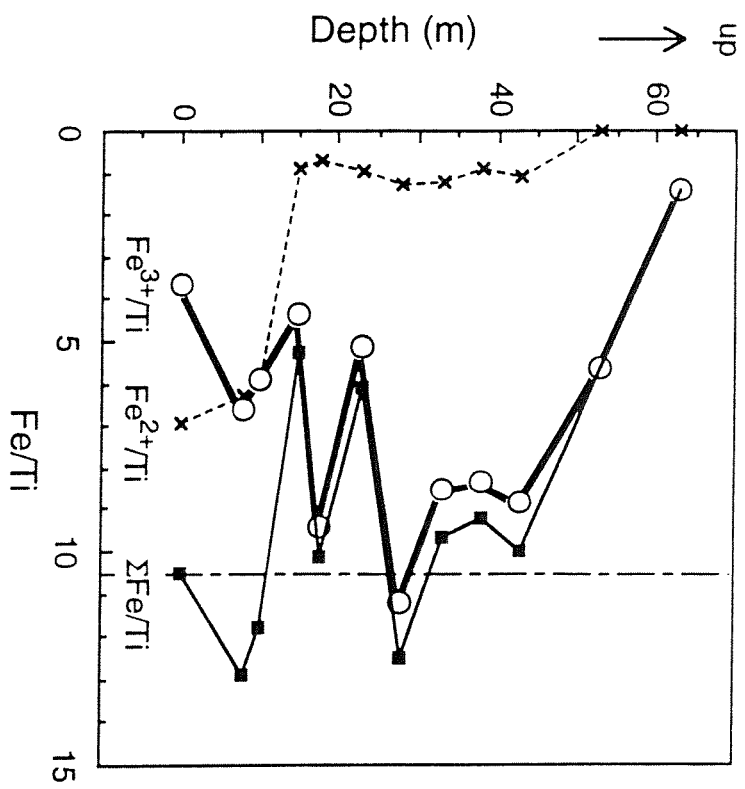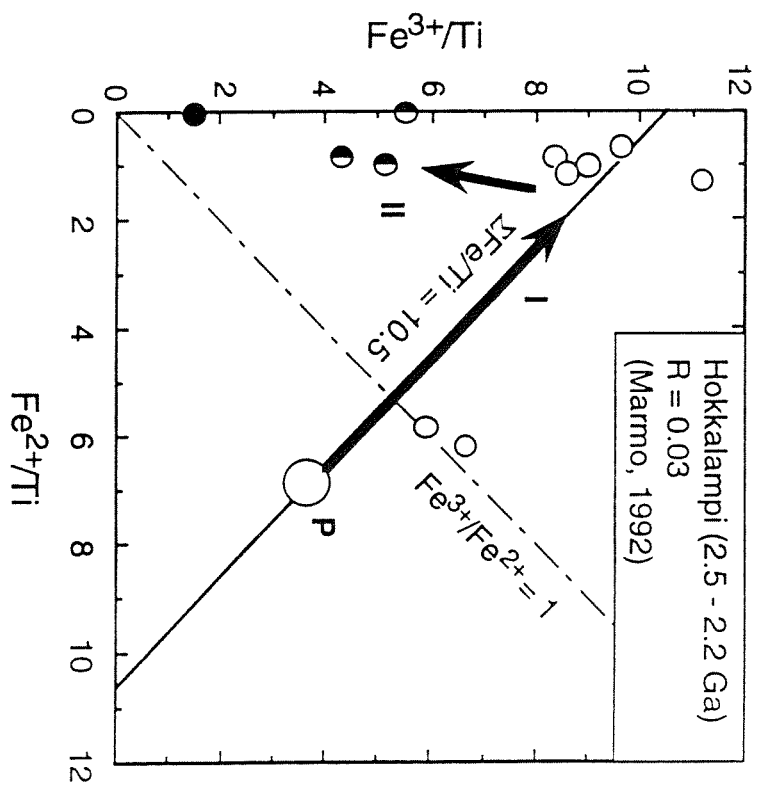

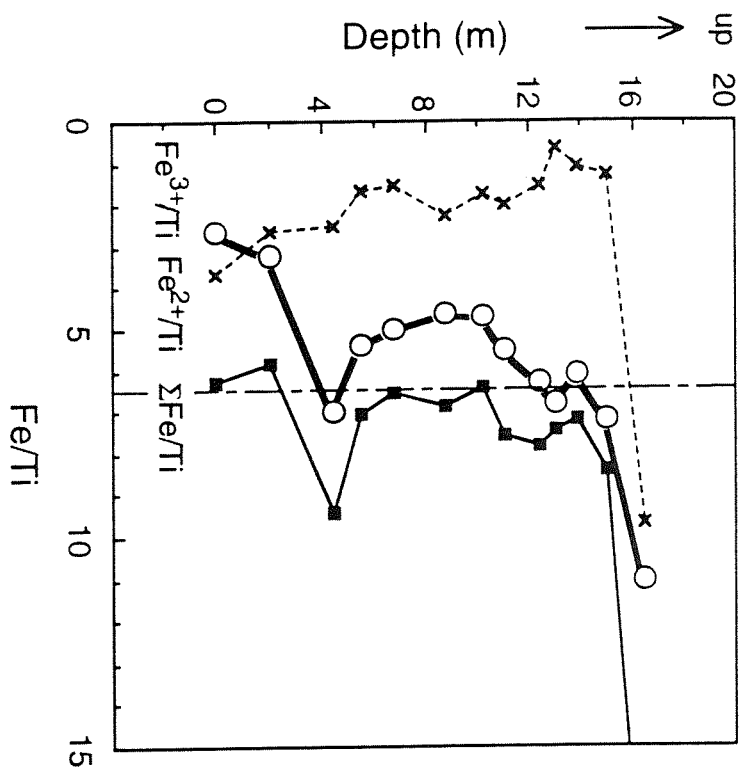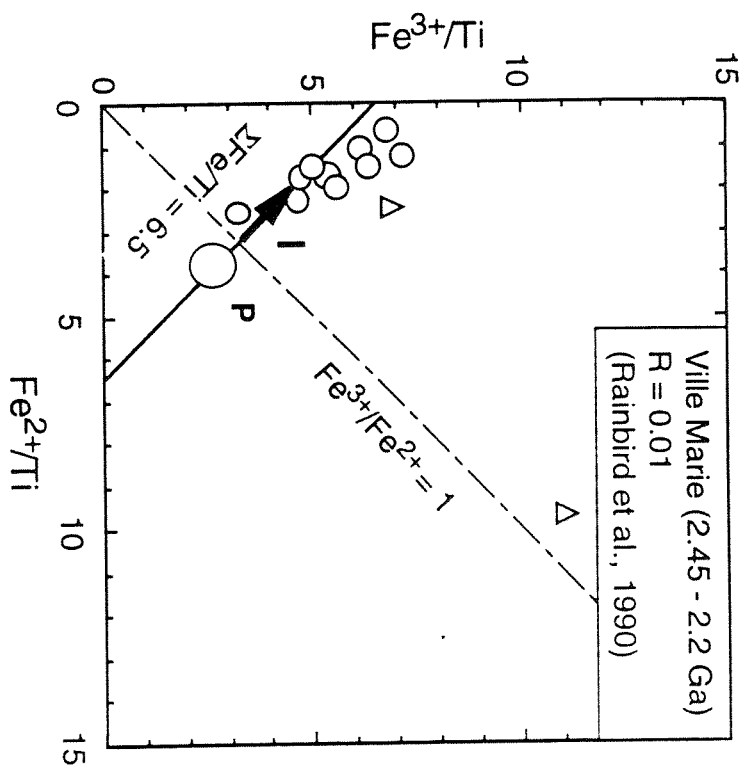

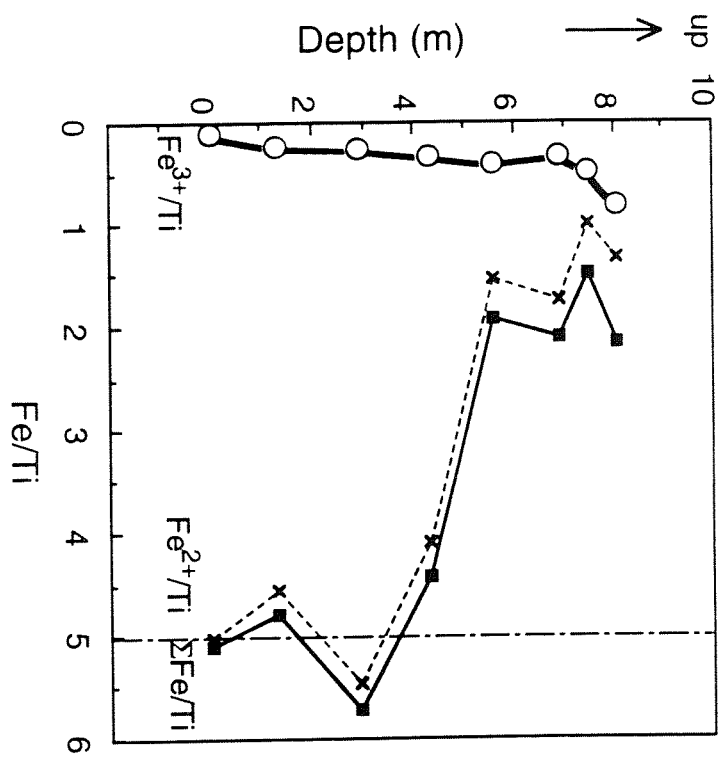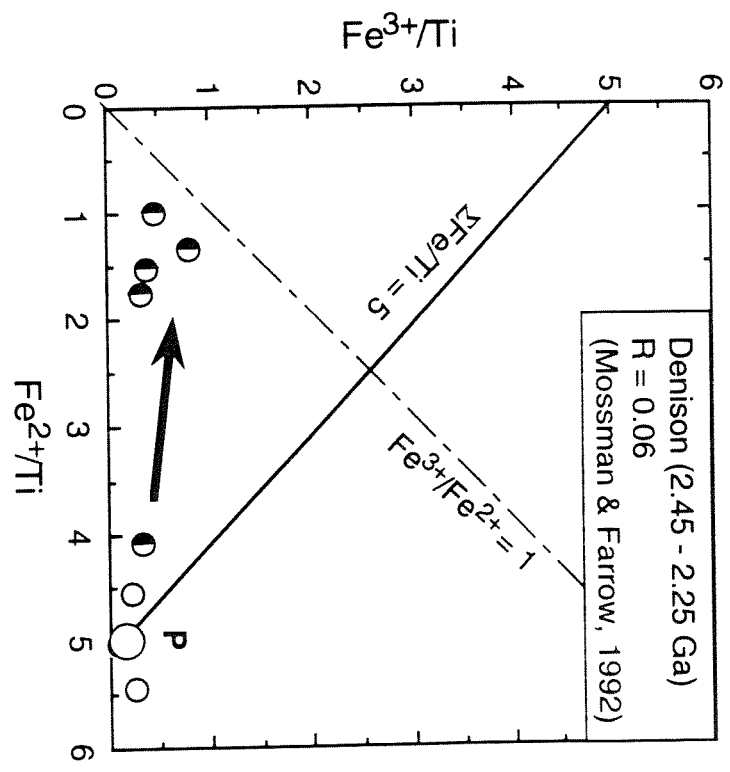

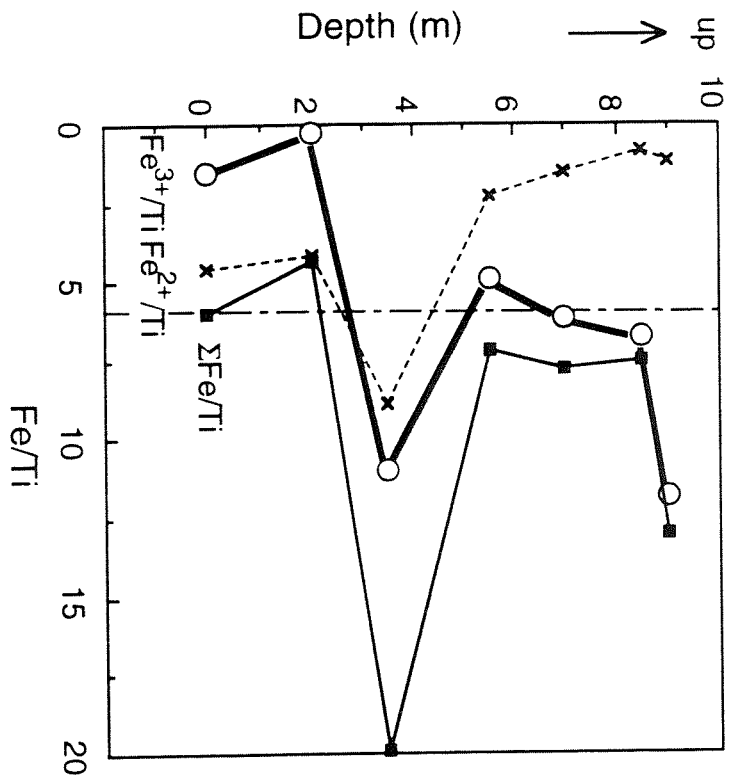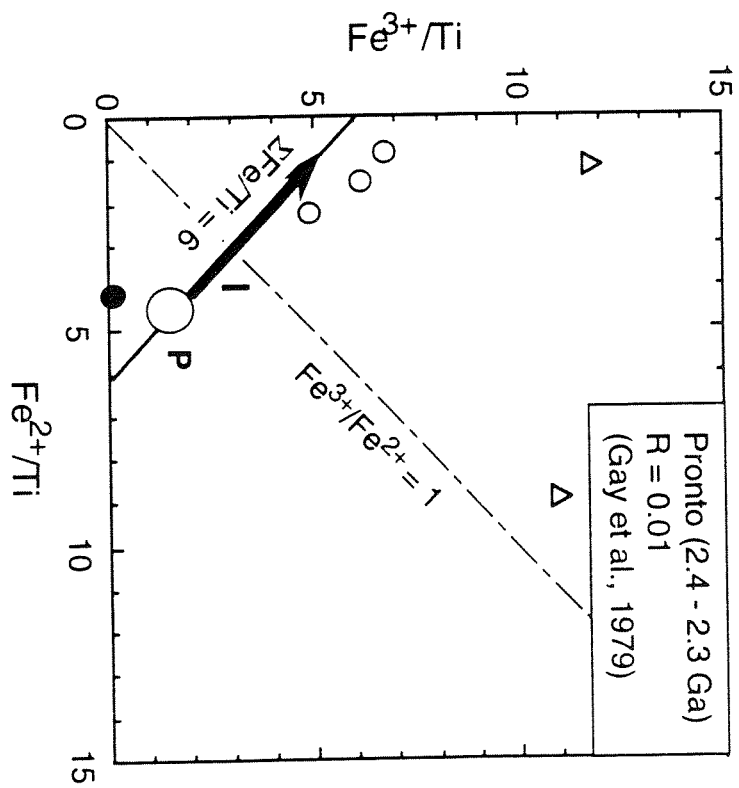

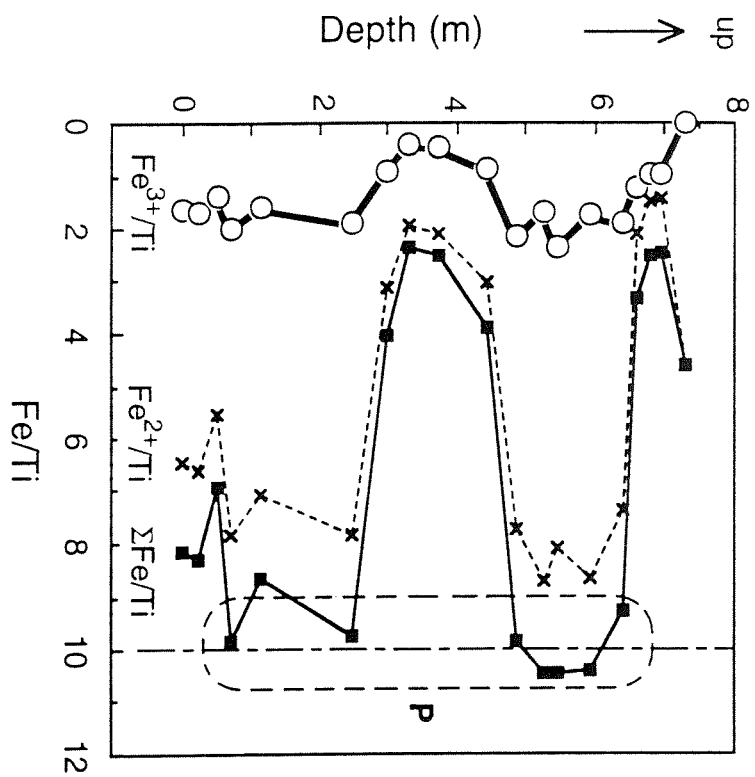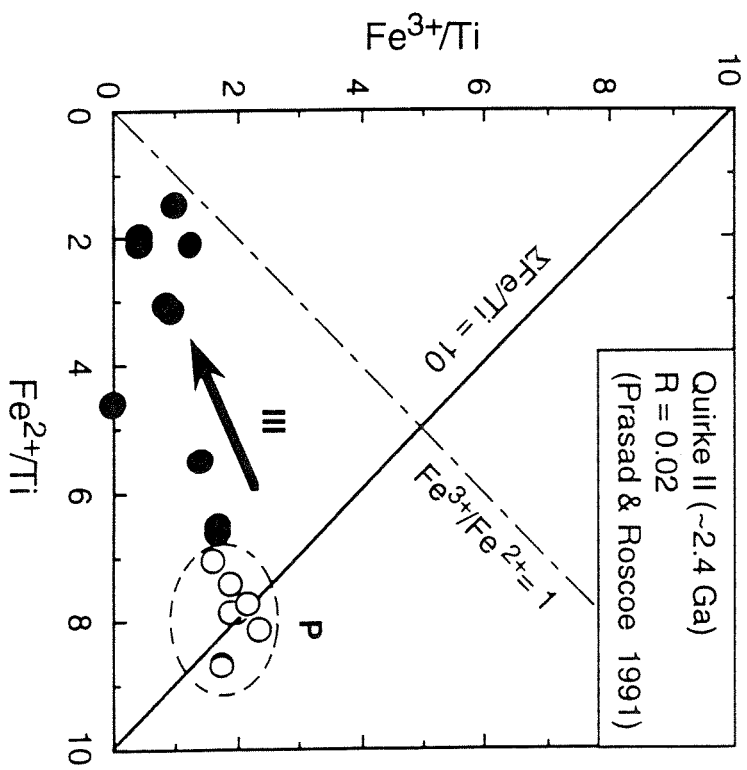

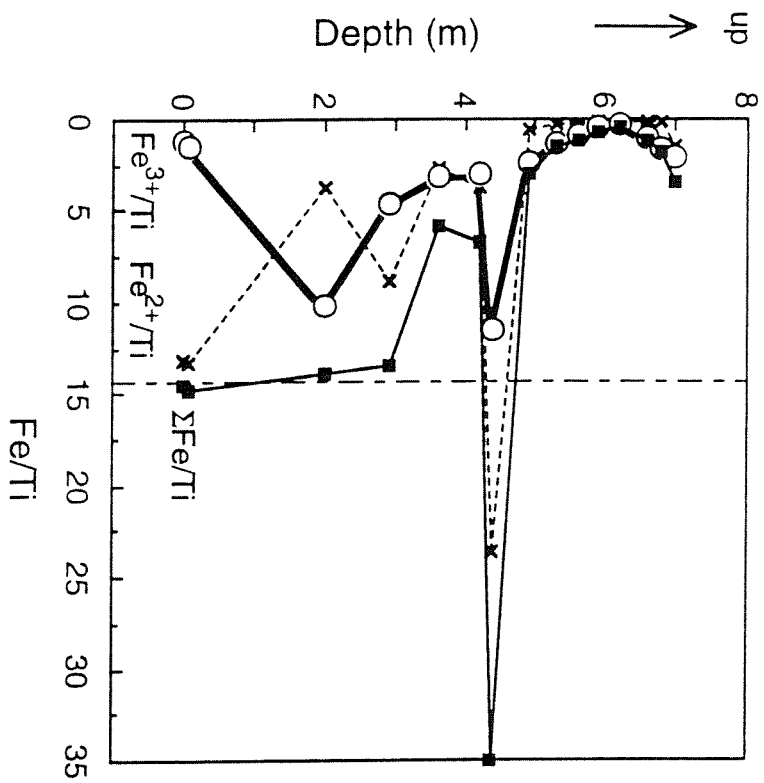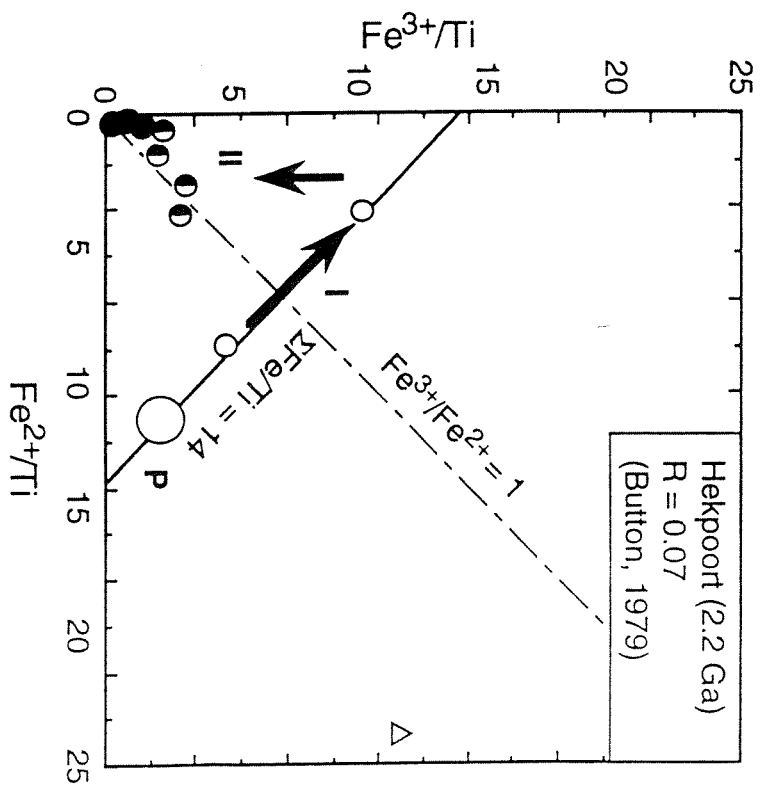

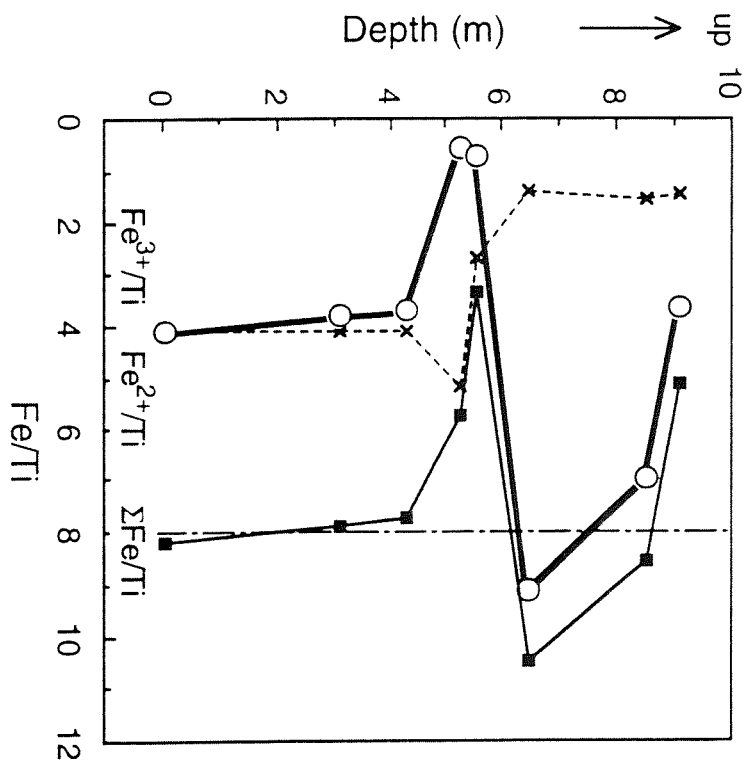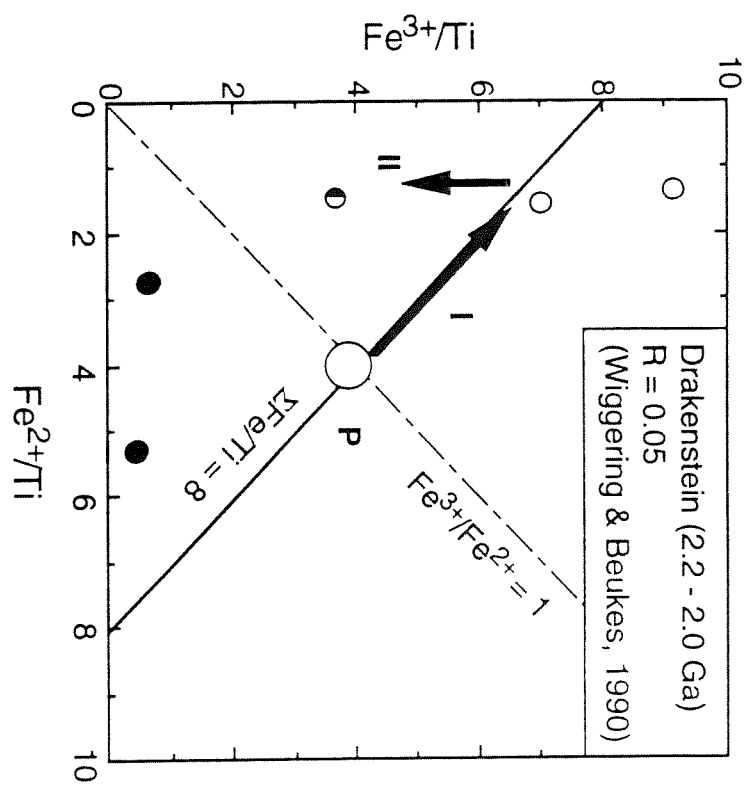



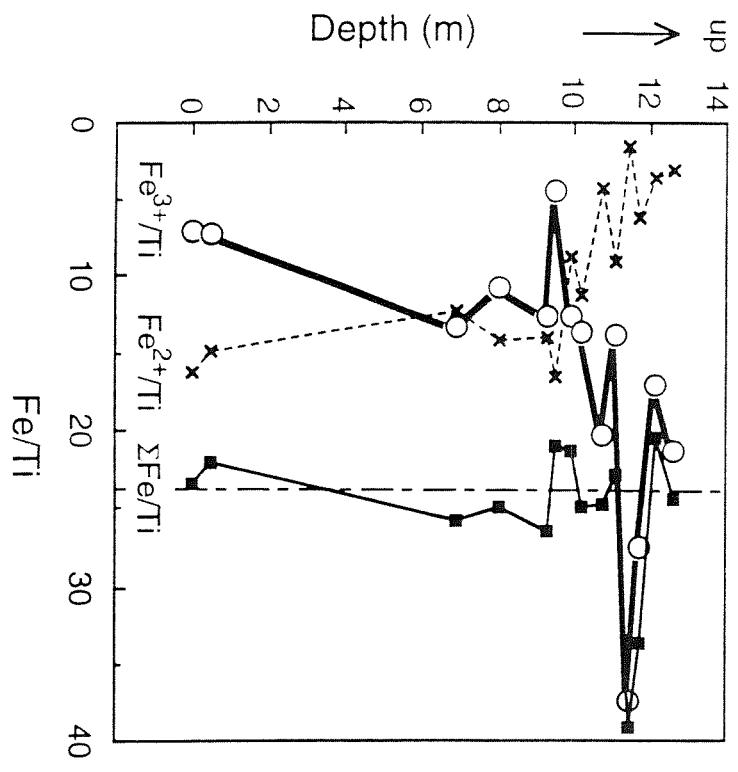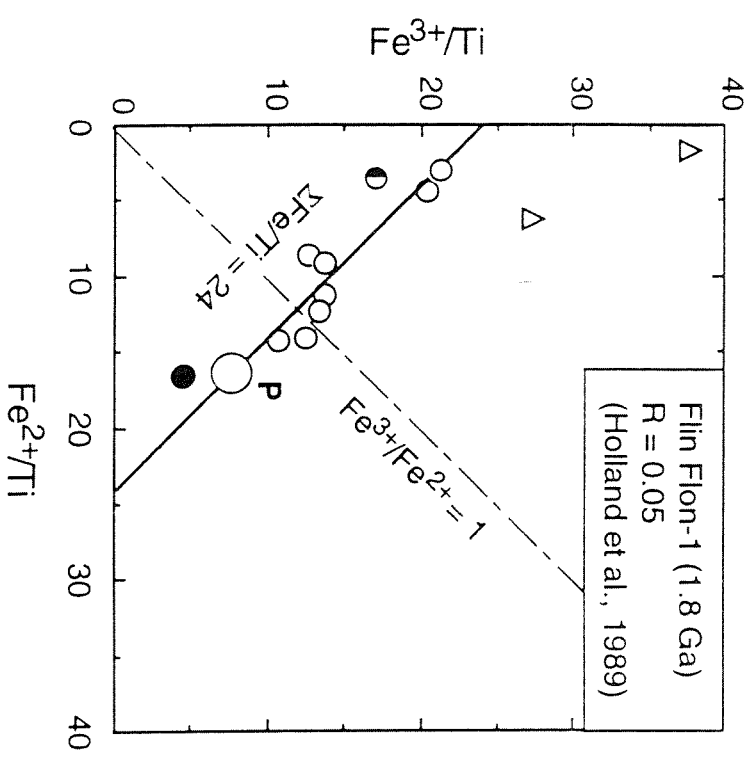

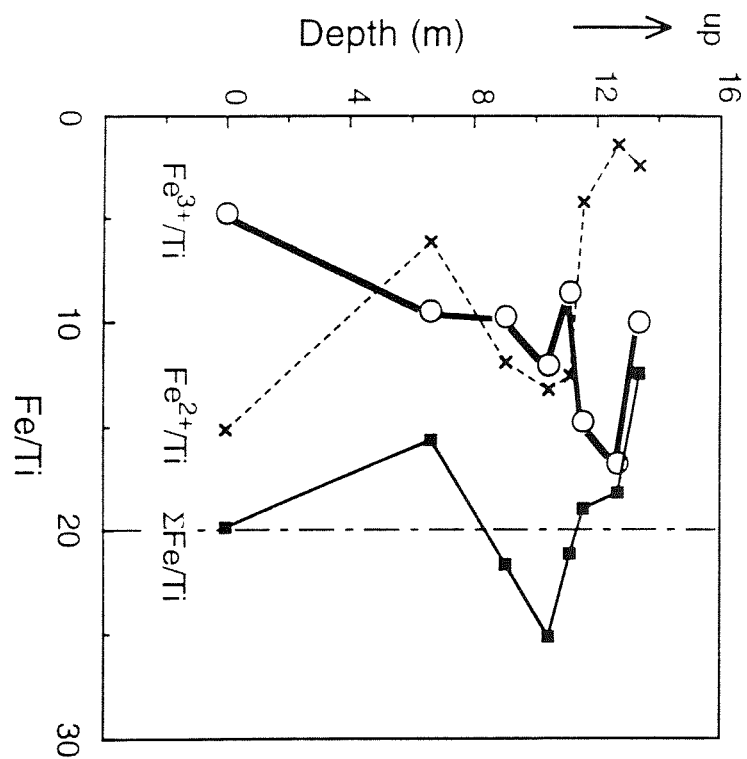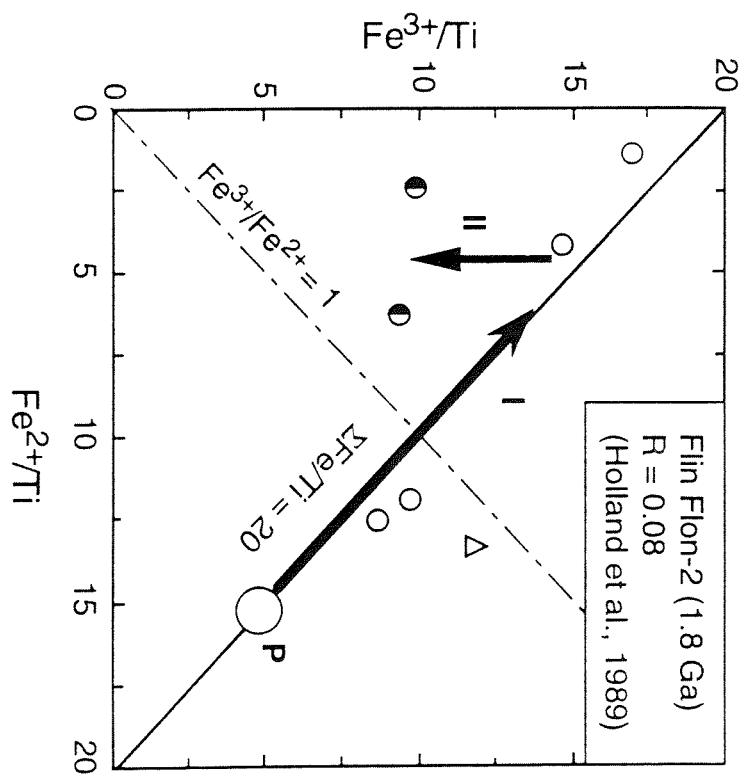

(Hole 20)

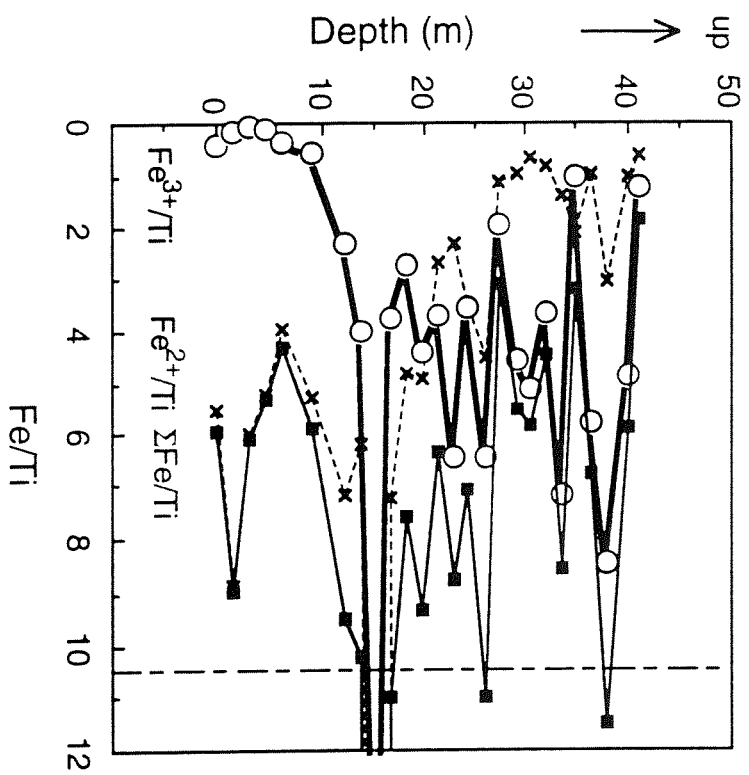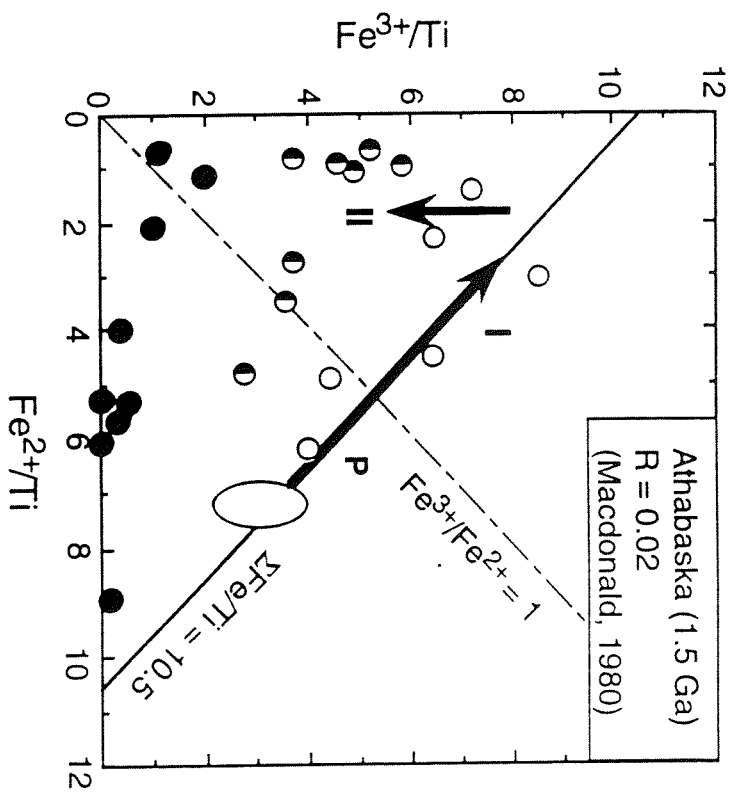

(Hole 81)

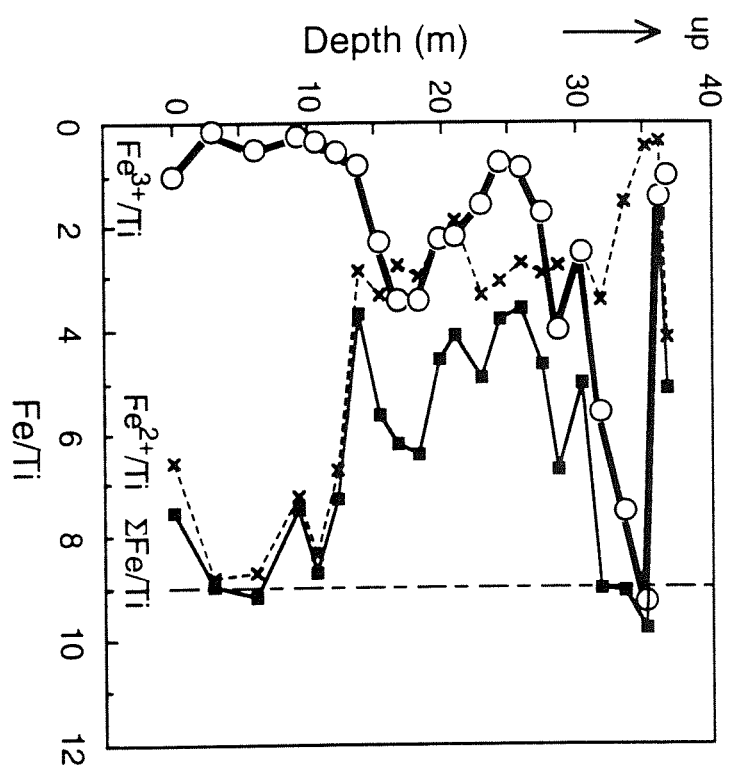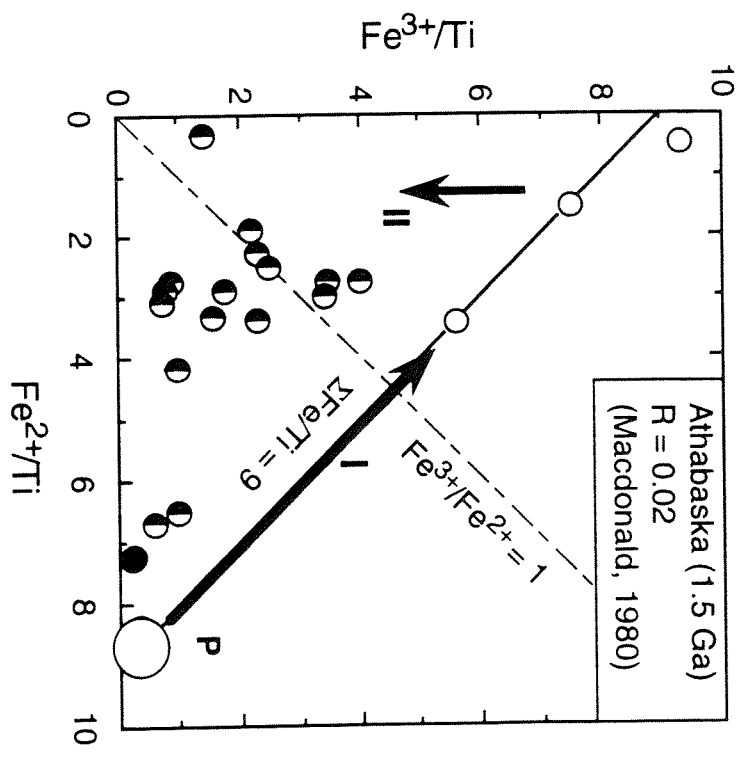

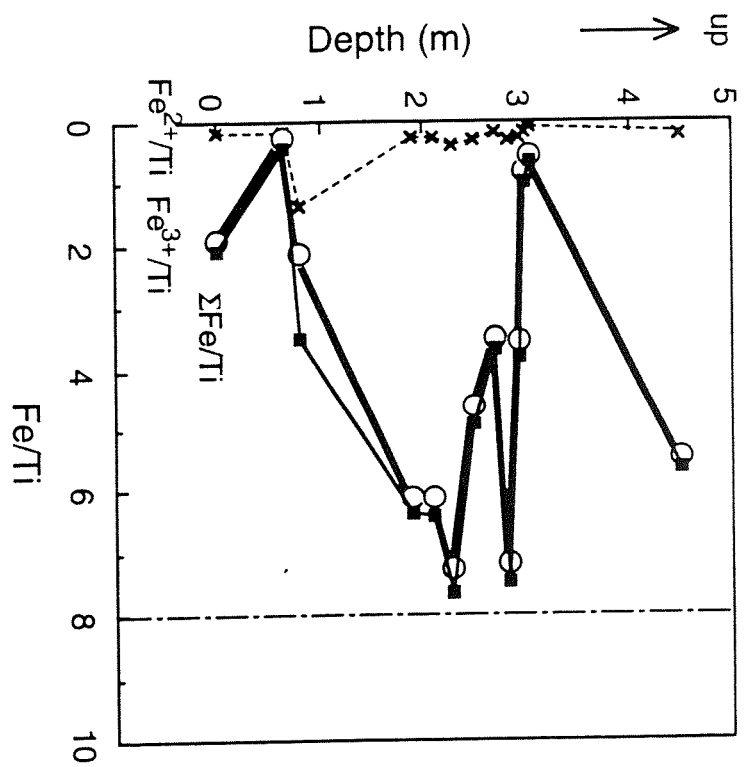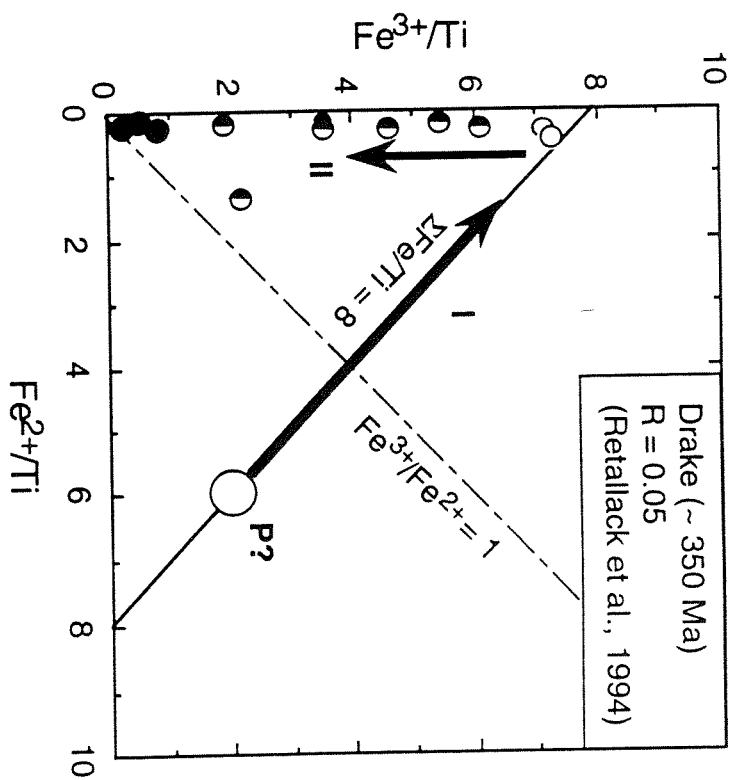

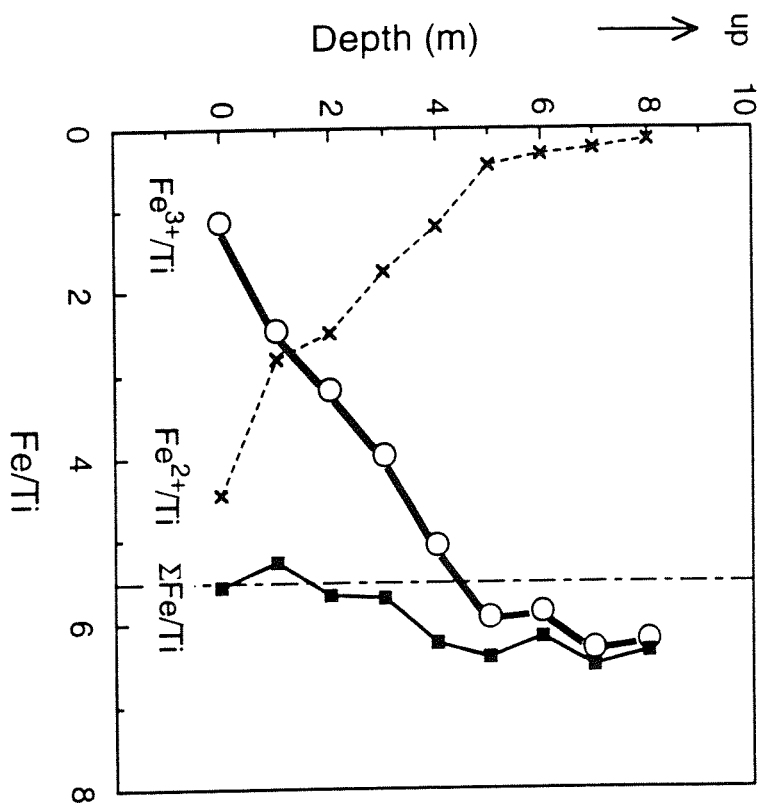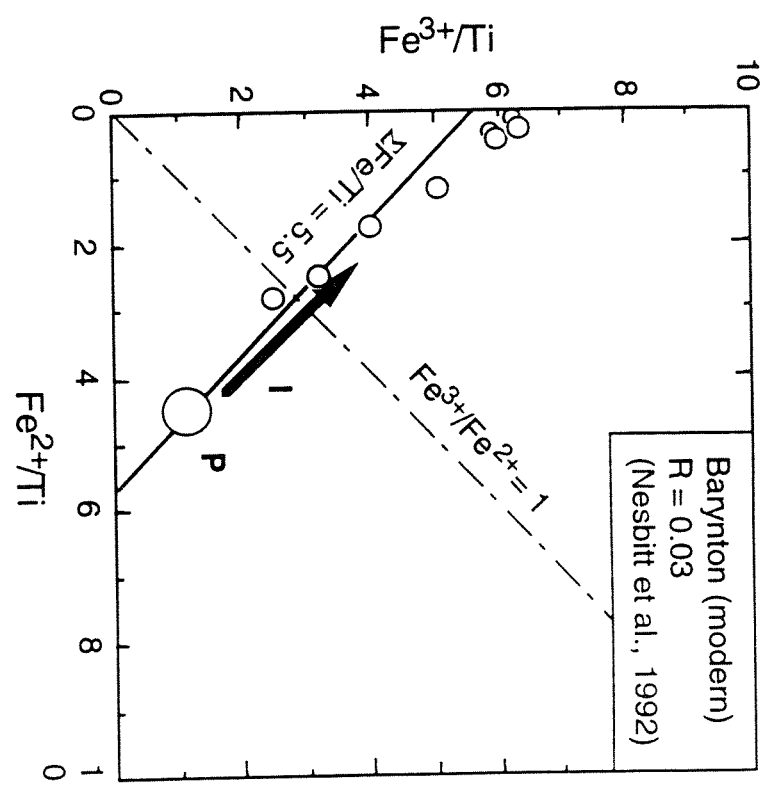

Supplement: Supplementary file 1 [file 22742204]
